# Supplementary material for: Neurodevelopmental milestones and associated behaviours are similar among healthy children across diverse geographical locations
Source: PubMed Central journal article supplement (PMC6353986; doi:10.1038/s41467-018-07983-4), 2019-01-30
Supplement: 41467_2018_7983_MOESM1_ESM.pdf [file 41467_2018_7983_MOESM1_ESM.pdf]

1  
2 **Supplementary information**

3  
4 **Supplementary Table 1.** Baseline characteristics of the mothers of the 2 year old  
5 children in the INTERGROWTH-21<sup>st</sup> Project Neurodevelopment Assessment cohort.  
6

|                                                      | <b>Brazil</b><br>(n=199) | <b>India</b><br>(n=318) | <b>Italy</b><br>(n=311) | <b>Kenya</b><br>(n=311) | <b>UK</b><br>(n=168) |
|------------------------------------------------------|--------------------------|-------------------------|-------------------------|-------------------------|----------------------|
| Maternal age (years)                                 | 28.4 (4.0)               | 26.8 (3.5)              | 28.7 (4.1)              | 28.6 (3.6)              | 30.1 (3.2)           |
| Maternal height (cm)                                 | 162.9<br>(5.5)           | 158.5<br>(3.4)          | 163.5<br>(6.1)          | 162.2<br>(5.5)          | 166.1<br>(6.3)       |
| Maternal weight (kg)                                 | 64.5 (8.7)               | 56.3 (8.4)              | 60.3 (8.1)              | 63.3 (9.1)              | 64.6 (8.8)           |
| Paternal height (cm)                                 | 173.2<br>(6.2)           | 168.1<br>(5.6)          | 177.3<br>(8.9)          | 174.9<br>(5.7)          | 180.4<br>(6.8)       |
| Maternal BMI (kg/m <sup>2</sup> )                    | 24.3 (2.9)               | 22.4 (3.1)              | 22.5 (2.7)              | 24.0 (3.1)              | 23.4 (2.8)           |
| Gestational age at first ultrasound visit (weeks)    | 11.3 (1.3)               | 11.6 (1.6)              | 12.1 (0.8)              | 11.7 (1.5)              | 12.2 (1.1)           |
| Years of formal education                            | 13.6 (3.3)               | 16.1 (1.3)              | 13.8 (3.9)              | 15.5 (1.3)              | 16.3 (3.0)           |
| Haemoglobin concentration <15 weeks' gestation (g/l) | 12.5 (0.9)               | 11.7 (0.6)              | 12.9 (0.9)              | 13.0 (1.2)              | 12.7 (0.8)           |
| Married or cohabiting                                | 193 (97.0)               | 314 (98.7)              | 305 (98.1)              | 277 (89.1)              | 167 (99.4)           |
| Nulliparous                                          | 147 (73.9)               | 229 (72.0)              | 195 (62.7)              | 198 (63.7)              | 111 (66.1)           |

7  
8 Data are mean (SD) or n (%). BMI: body mass index.  
9  
10

11

12 **Supplementary Table 2.** Number of observations available for individual domains of  
 13 the INTERGROWTH-21<sup>st</sup> Neurodevelopment Assessment, Cardiff tests and age of  
 14 achievement of two WHO gross motor development milestones.

15

| <b>Domain</b>                      | <b>Brazil</b> | <b>India</b> | <b>Italy</b> | <b>Kenya</b> | <b>UK</b> | <b>TOTAL</b> |
|------------------------------------|---------------|--------------|--------------|--------------|-----------|--------------|
| <b>Cognitive</b>                   | 199           | 317          | 310          | 309          | 159       | 1294         |
| <b>Executive function-like</b>     | 199           | 317          | 310          | 310          | 161       | 1297         |
| <b>Attentional problems</b>        | 199           | 318          | 311          | 311          | 141       | 1280         |
| <b>Visual acuity</b>               | 198           | 315          | 305          | 288          | 161       | 1267         |
| <b>Visual contrast sensitivity</b> | 191           | 316          | 303          | 286          | 158       | 1254         |
| <b>Fine motor</b>                  | 199           | 317          | 310          | 309          | 159       | 1294         |
| <b>Gross motor</b>                 | 199           | 317          | 310          | 309          | 159       | 1294         |
| <b>Receptive language</b>          | 199           | 317          | 310          | 309          | 157       | 1292         |
| <b>Expressive language</b>         | 199           | 317          | 310          | 309          | 159       | 1294         |
| <b>Positive behaviour</b>          | 199           | 317          | 310          | 310          | 161       | 1297         |
| <b>Negative behaviour</b>          | 199           | 317          | 310          | 310          | 161       | 1297         |
| <b>Total behaviour</b>             | 199           | 317          | 310          | 310          | 161       | 1297         |
| <b>Emotional reactivity</b>        | 199           | 318          | 311          | 311          | 141       | 1280         |
| <b>Positive affect</b>             | 199           | 318          | 311          | 311          | 141       | 1280         |
| <b>Standing alone</b>              | 194           | 318          | 311          | 306          | 162       | 1291         |
| <b>Walking alone</b>               | 194           | 318          | 309          | 309          | 164       | 1294         |

16

17

18

19

20

21

22

23
